# Supplementary material
Source: ML conference proceedings conference paper supplement (https://aclanthology.org/D18-1284)
Supplement: Attachment [file D18-1284.Attachment.zip]

# Learning Personas from Dialogues with Attentive Memory Networks: Supplementary Material

Eric Chu \*  
MIT Media Lab  
echu@mit.edu

Prashanth Vijayaraghavan\*  
MIT Media Lab  
pralav@mit.edu

Deb Roy  
MIT Media Lab  
dkroy@media.mit.edu

## A Read-Write Memory Losses

### A.1 Memory Ranking Loss $J_{MR}$

We want the model to learn to make efficient matches with the memory keys in order to facilitate look up on past data. To do this, we find a positive and negative neighbor after computing the  $k$  nearest neighbors  $(n_1, \dots, n_k)$  by finding the smallest index  $p$  such that  $V[p] = P$  and  $n$  such that  $V[n] \neq P$  respectively. We define the memory ranking loss as:

$$J_{MR} = \max(0, s(z, K[n]) - s(z, K[p]) + \alpha_{MR}) \quad (1)$$

where  $\alpha_{MR}$  is a learnable margin parameter and  $s(\cdot, \cdot)$  denotes the similarity between persona embeddings  $(z)$ , key representations of positive  $(K[p])$  and negative  $(K[n])$  neighbors. The above equation is consistent with the memory loss defined in the original work (Kaiser and Nachum, 2017).

### A.2 Memory Classification Loss $J_{MCE}$

The Read-Write memory returns  $\hat{z}_M$  and values  $v_M = V[n_i] \forall i \in \{n_1, \dots, n_k\}$ . The probability of the given input dialogues belonging to a particular persona category  $P$  is computed using values  $v_M$  returned from the memory via:

$$q^M = \text{softmax}(f_{PM}(v_M)) \quad (2)$$

where  $f_{PM} : \mathbb{R}^k \mapsto \mathbb{R}^{N_P}$  is a fully-connected layer. We replace the  $q_j$  with  $q_j^M$  in Equation 12 and calculate the categorical cross entropy to get  $J_{MCE}$ .

## B Experimental details

The vocabulary size was set to 20000. We used a GRU hidden size of 200, a word embedding size of

300, and the word embedding lookup was initialized with GLoVe (Pennington et al., 2014). For the Read-Write memory module, we used  $k=8$  when calculating the nearest neighbors and a memory size of 150. Our models were trained using Adam (Kingma and Ba, 2014).

## References

- Lukasz Kaiser and Ofir Nachum. 2017. Aurko roy, and samy bengio. *Learning to remember rare events. arXiv preprint*.
- Diederik P Kingma and Jimmy Ba. 2014. Adam: A method for stochastic optimization. *arXiv preprint arXiv:1412.6980*.
- Jeffrey Pennington, Richard Socher, and Christopher Manning. 2014. Glove: Global vectors for word representation. In *Proceedings of the 2014 conference on empirical methods in natural language processing (EMNLP)*, pages 1532–1543.

---

The first two authors contributed equally to this work
